# Supplementary material
Source: Springer Nature journal article supplement (https://www.springermedizin.de/resource/supplementary/12911_2011_571_MOESM3_ESM.pdf/9526140)
Supplement: MOESM3 [file 9526140]

Qualitative effects explored using questioning – hermeneutic inspired process

**Research process**

**Questions asked in the different stages**

Aim: Research question:

How can an online contact contribute in the overall contact between men with prostate cancer and the healthcare professionals?

Evaluation: Web-based survey comprised of open-ended questions:

Describe how you use the online contact to the healthcare professionals in your course

Describe the meaning the online contact to the healthcare professionals has in relation to your course

Analysing: Questions asked when analyzing the data

How is the online contact used?  
What are the qualitative effects?  
How the online contact works?  
What the online contact contributes to?
